# Supplementary material for: Fibroblast-derived extracellular vesicles contain SFRP1 and mediate pulmonary fibrosis
Source: PubMed Central journal article supplement (PMC11457858; doi:10.1172/jci.insight.168889), 2024-08-15

Figure 2D

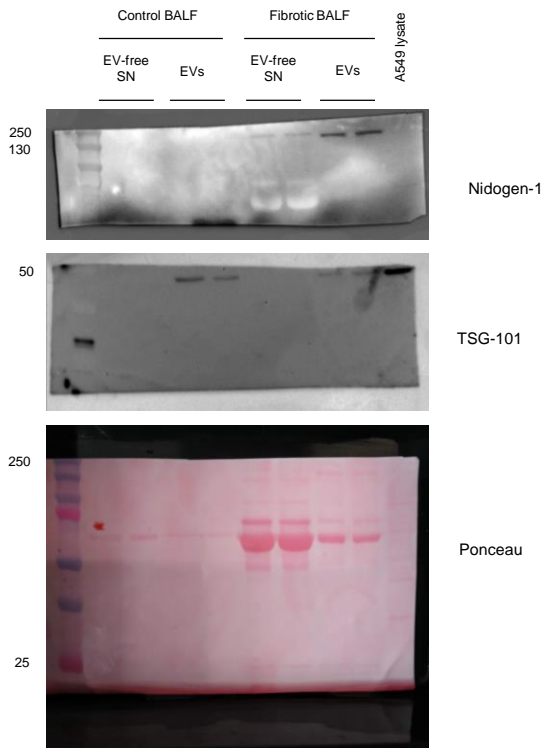

Figure 3I

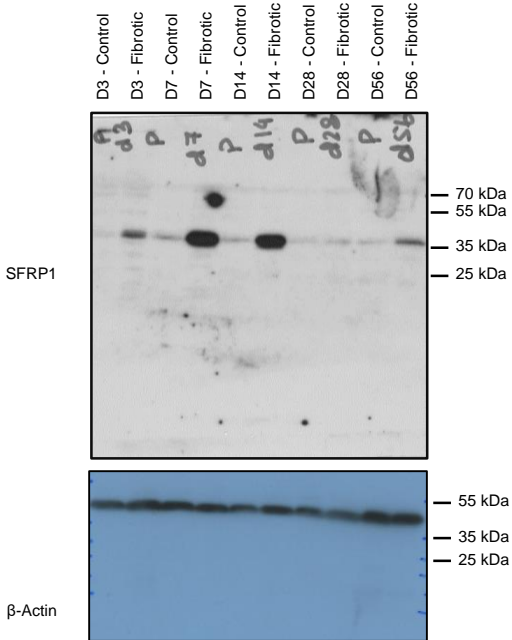

Figure 3K

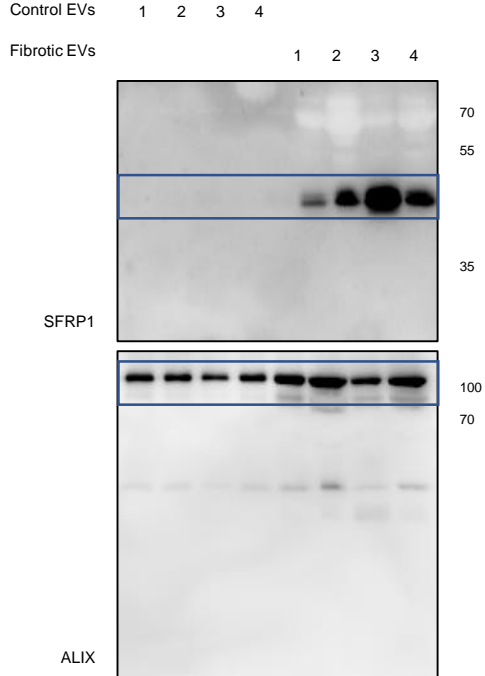

Figure 4A

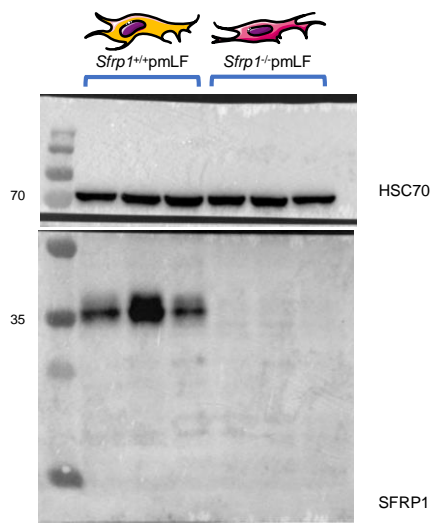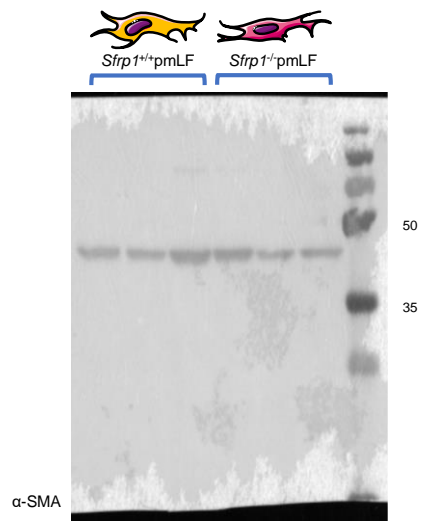

Figure 6C

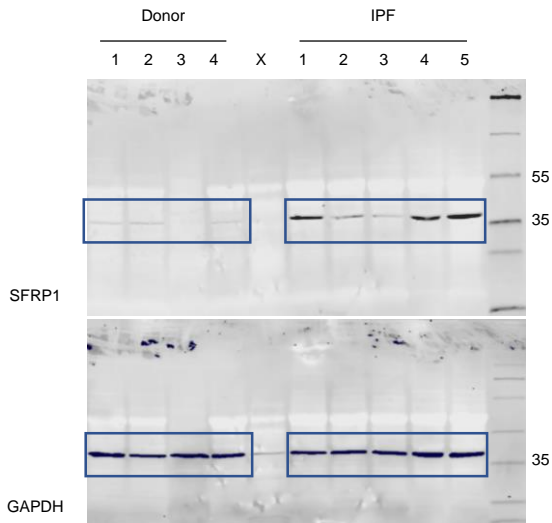

Figure 6D

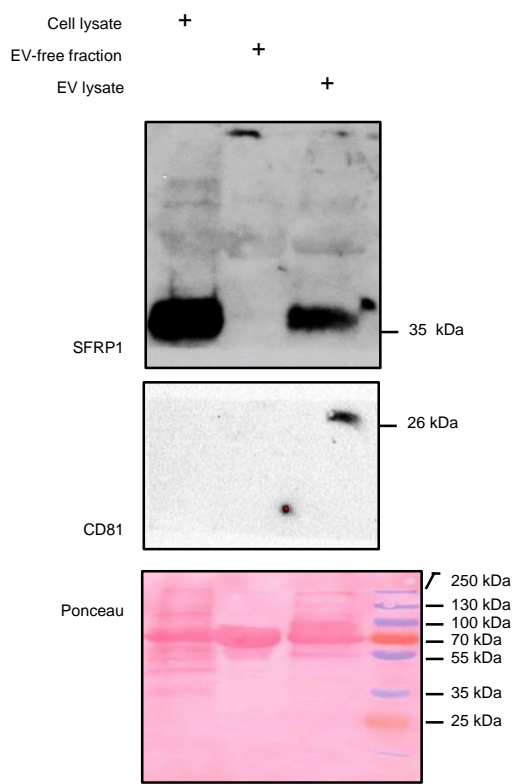

Figure S3A

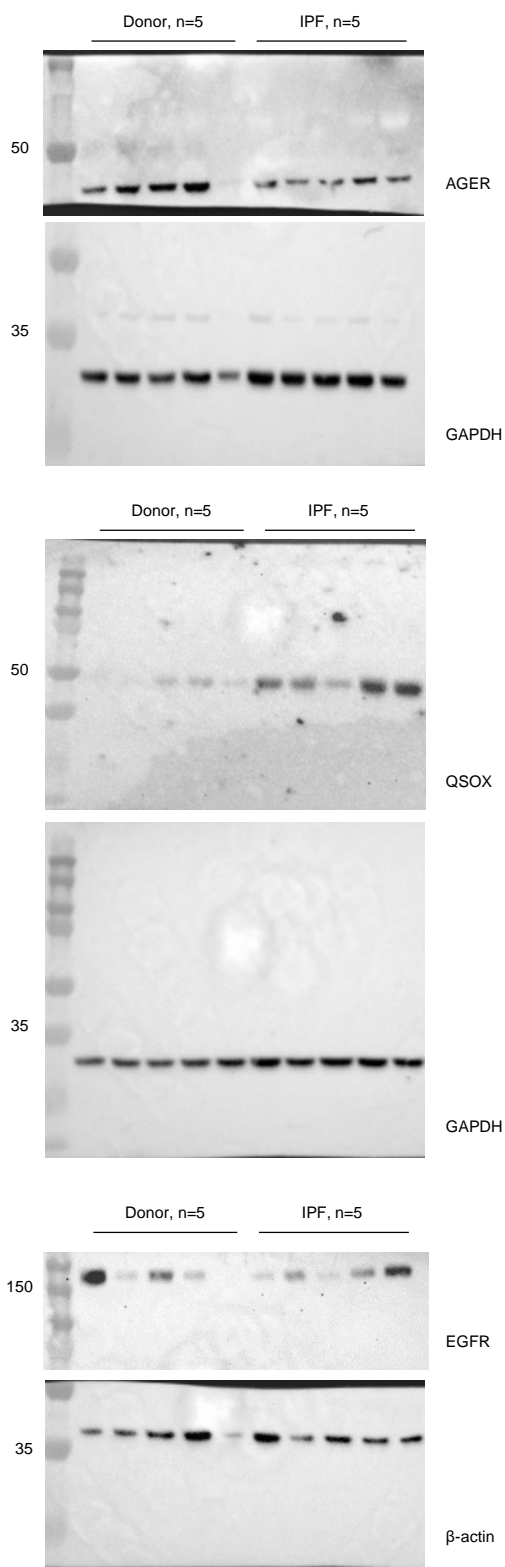

Figure S3B

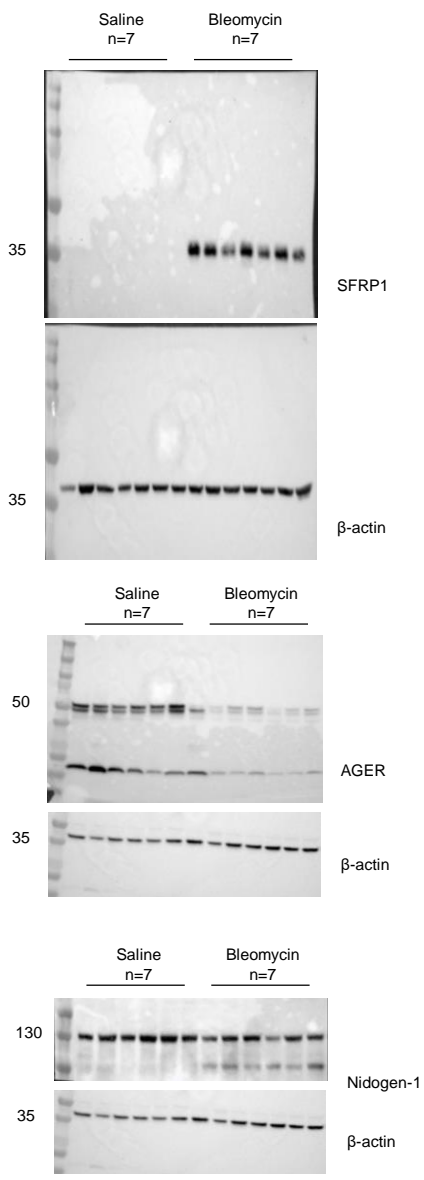

Figure S10A

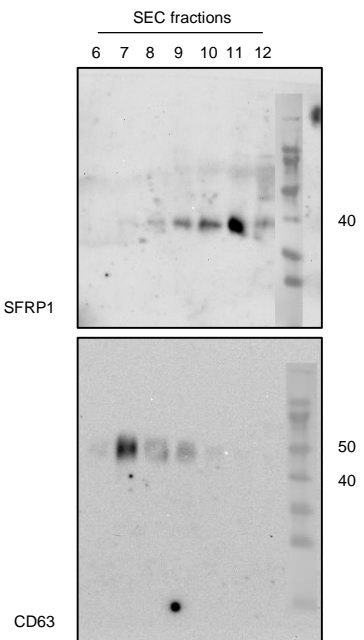

Figure S10B

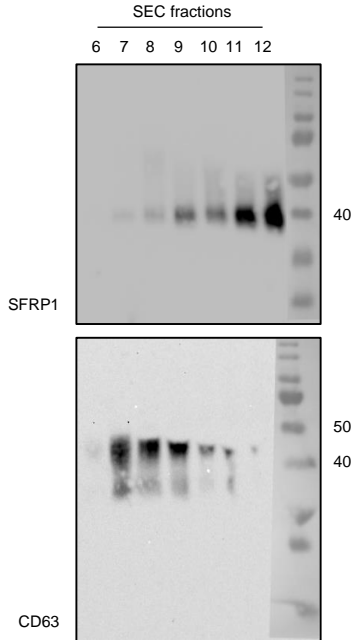

Supplement: jciinsight-9-168889-s188.pdf [file jciinsight-9-168889-s188.pdf]
